# Supplementary material
Source: PubMed Central journal article supplement (PMC4194097)
Supplement: embj0033-1624-sd1.pdf [file embj0033-1624-sd1.pdf]

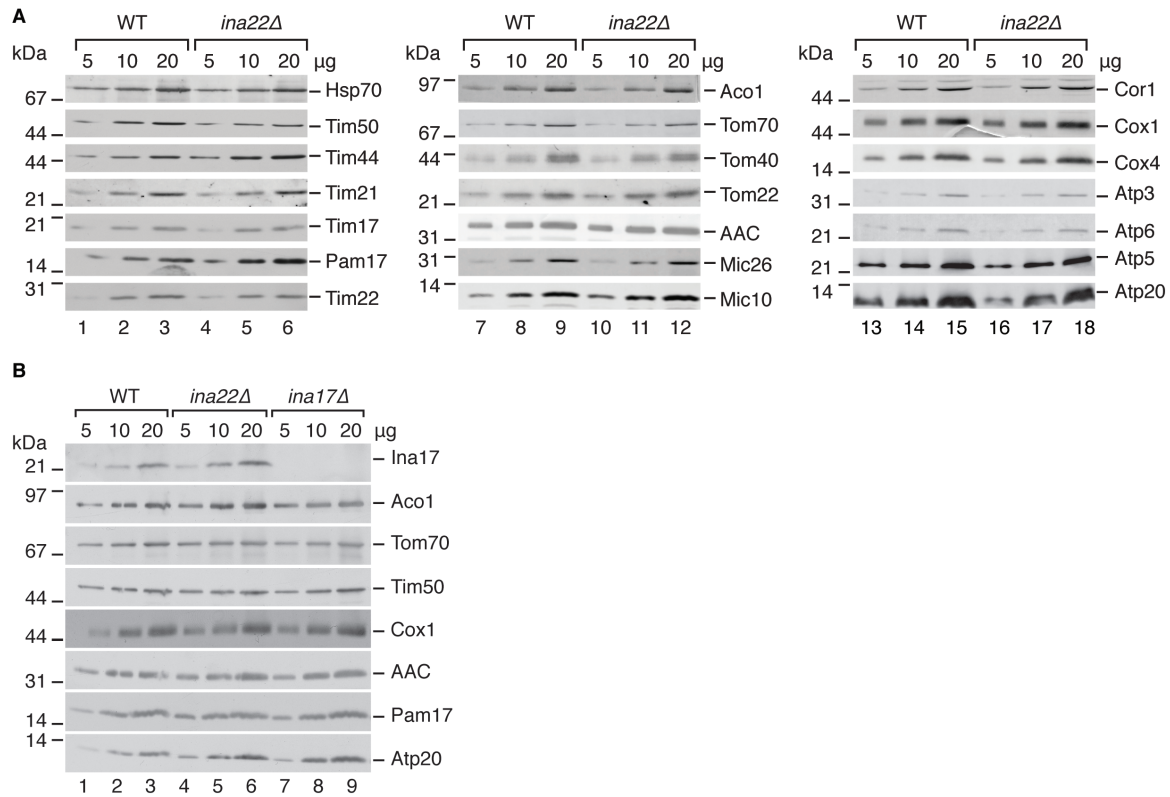

**Figure S1 (A, B)** Steady-state protein analyses of wild type and *ina22Δ* (**A, B**) and *ina17Δ* (**B**) mitochondria. Indicated amounts of mitochondria solubilized in SDS gel loading buffer were analyzed by SDS-PAGE and Western blotting with indicated antisera.
