# Supplementary material
Source: PubMed Central journal article supplement (PMC4194097)
Supplement: embj0033-1624-sd2.pdf [file embj0033-1624-sd2.pdf]

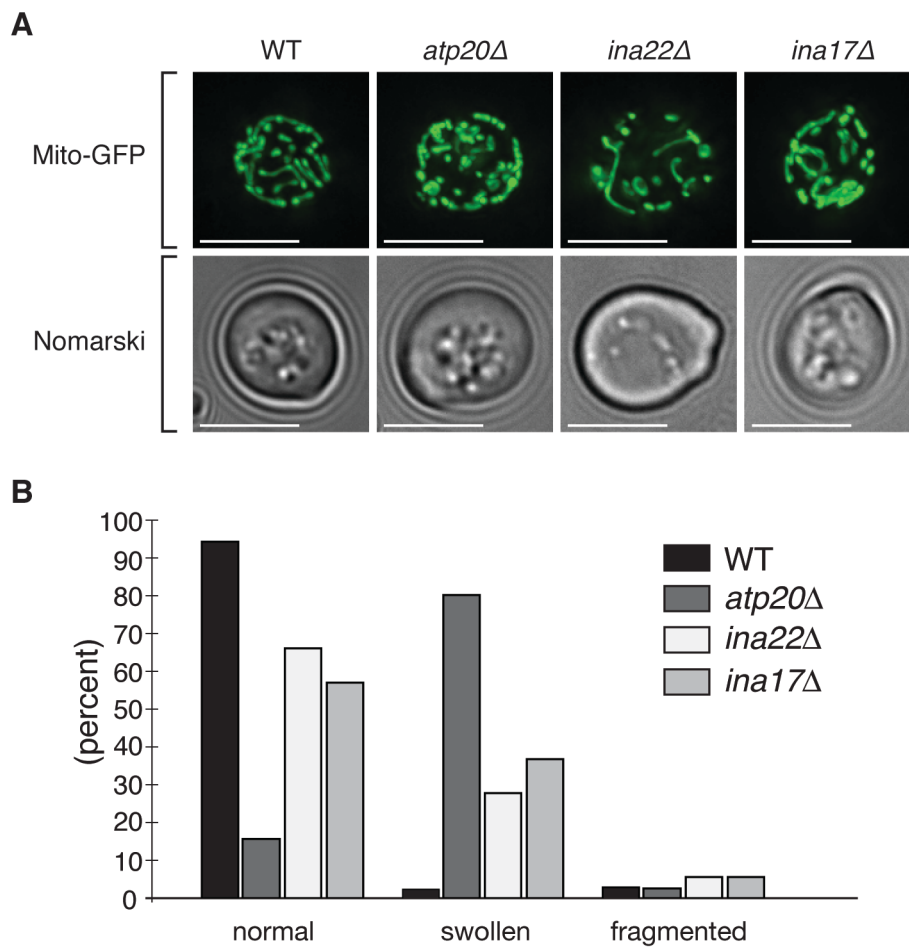

**Figure S2** Morphology of WT, *atp20Δ*, *ina22Δ* and *ina17Δ* mitochondria (A). The morphology was assessed by fluorescence microscopy of pVT100U-mitoGFP-transformed cells, as described in Materials and Methods. Scale bar, 5  $\mu$ m. Quantification of the mitochondrial morphology of WT, *atp20Δ*, *ina22Δ* and *ina17Δ* cells (B), n=100.
