# Supplementary material
Source: PubMed Central journal article supplement (PMC4194097)
Supplement: embj0033-1624-sd4.pdf [file embj0033-1624-sd4.pdf]

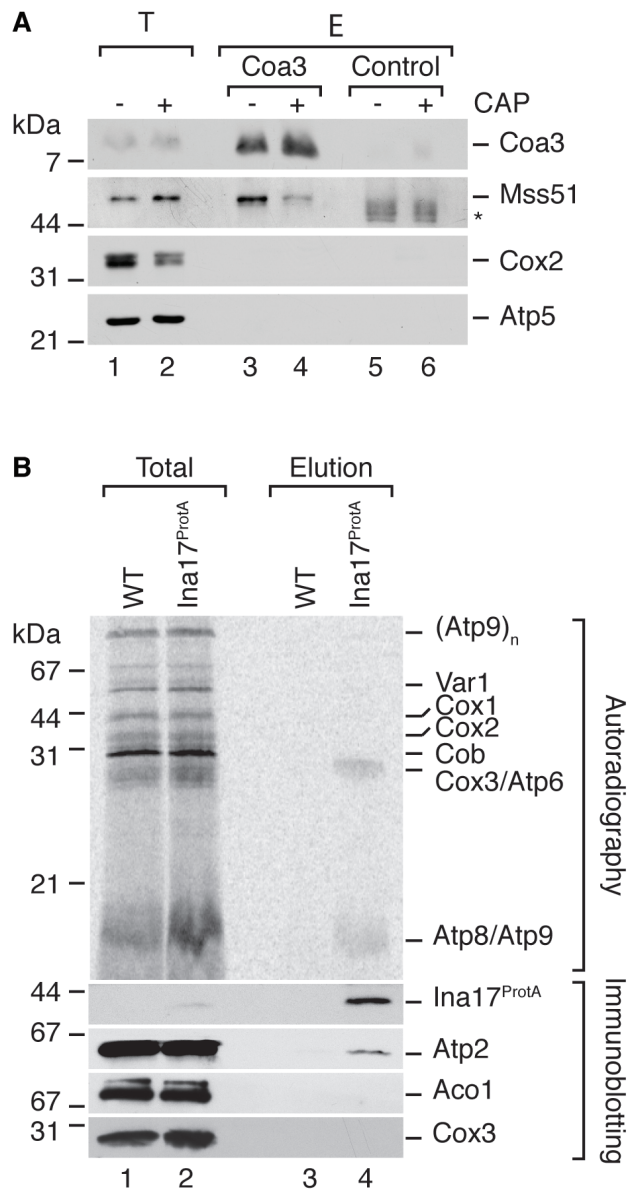

**Figure S4 Interaction of INAC with mitochondria-encoded ATP synthase subunits (A)** Immunoprecipitation using anti-Coa3 or unrelated (control) antisera was performed from chloramphenicol (CAP)-treated and control mitochondria. \*, antibody cross-reaction. Total (T), 1%, elution (E), 100%. **(B)** Mitochondrial translation products were [<sup>35</sup>S]Met-labeled *in organello* in wild type and Ina17<sup>ProtA</sup> strains and isolated by IgG affinity chromatography. Eluted proteins were analyzed by autoradiography and immunoblotting, as indicated. Total, 5%, elution, 100%.
