# Supplementary material
Source: PubMed Central journal article supplement (PMC4194097)
Supplement: embj0033-1624-sd5.pdf [file embj0033-1624-sd5.pdf]

Supplemental Table S1. Yeast strains used in this study

| Strain                                          | Genotype                                                                                                                          | Reference                     |
|-------------------------------------------------|-----------------------------------------------------------------------------------------------------------------------------------|-------------------------------|
| BY4741                                          | <i>MATa; his3Δ1; leu2Δ0; met15Δ0; ura3Δ0</i>                                                                                      | Brachmann <i>et al</i> , 1998 |
| YPH499                                          | <i>MATa; ura3-52; lys2-801_amber; ade2-101_ochre; trp1-Δ63; his3-Δ200; leu2-Δ1</i>                                                | Sikorski & Hieter, 1989       |
| YPH499 for SILAC                                | <i>MATa; ura3-52; lys2-801_amber; ade2-101_ochre; trp1-Δ63; his3-Δ200; leu2-Δ1; ARG4::kanMX4</i>                                  | Alkhaja <i>et al</i> , 2012   |
| <i>ina22Δ</i>                                   | <i>MATa; his3Δ1; leu2Δ0; met15Δ0; ura3Δ0; INA22::kanMX4</i>                                                                       | Euroscarf                     |
| <i>ina22Δ</i> (OLY01)                           | <i>MATa; ura3-52; lys2-801_amber; ade2-101_ochre; trp1-Δ63; his3-Δ200; leu2-Δ1; INA22::HIS3MX6</i>                                | This study                    |
| <i>Ina22<sup>HA</sup></i> (OLY02)               | <i>MATa; ura3-52; lys2-801_amber; ade2-101_ochre; trp1-Δ63; his3-Δ200; leu2-Δ1; ina22::INA22<sup>HA</sup>-HIS3MX6</i>             | This study                    |
| <i>Ina22<sup>HA</sup></i> (OLY03)               | <i>MATa; his3Δ1; leu2Δ0; met15Δ0; ura3Δ0; ina22::INA22<sup>HA</sup>-HIS3MX6</i>                                                   | This study                    |
| <i>Ina22<sup>HA</sup></i> <i>aim43Δ</i> (OLY04) | <i>MATa; his3Δ1; leu2Δ0; met15Δ0; ura3Δ0; INA17::kanMX4; ina22::INA22<sup>HA</sup>-HIS3MX6</i>                                    | This study                    |
| <i>Ina22<sup>ProtA</sup></i> (OLY05)            | <i>MATa; ura3-52; lys2-801_amber; ade2-101_ochre; trp1-Δ63; his3-Δ200; leu2-Δ1; ina22::INA22<sup>TEV-ProtA-7His</sup>-HIS3MX6</i> | This study                    |
| <i>Ina22<sup>ProtA</sup></i> for SILAC          | <i>MATa; ura3-52; lys2-801_amber; ade2-101_ochre; trp1-Δ63; his3-Δ200; leu2-Δ1; ARG4::kanMX4;</i>                                 | This study                    |

|                                                           |                                                                                                                        |            |
|-----------------------------------------------------------|------------------------------------------------------------------------------------------------------------------------|------------|
| (OLY06)                                                   | <i>ina22::INA22<sup>TEV-ProtA-7His</sup> - HIS3MX6</i>                                                                 |            |
| <i>ina17Δ</i>                                             | <i>MATa; his3Δ1; leu2Δ0; met15Δ0; ura3Δ0;</i><br><i>INA17::kanMX4</i>                                                  | Euroscarf  |
| <i>Ina17<sup>HA</sup></i><br>(OLY07)                      | <i>MATa; his3Δ1; leu2Δ0; met15Δ0; ura3Δ0;</i><br><i>ina17::INA17<sup>HA</sup> - HIS3MX6</i>                            | This study |
| <i>Ina17<sup>ProtA</sup></i><br>(OLY08)                   | <i>MATa; his3Δ1; leu2Δ0; met15Δ0; ura3Δ0;</i><br><i>ina17::INA17<sup>TEV-ProtA-7His</sup> - HIS3MX6</i>                | This study |
| <i>Ina17<sup>ProtA</sup></i><br><i>/ina22Δ</i><br>(OLY09) | <i>MATa; his3Δ1; leu2Δ0; met15Δ0; ura3Δ0;</i><br><i>INA22::kanMX4; ina17::INA17<sup>TEV-ProtA-7His</sup> - HIS3MX6</i> | This study |
| <i>ina17Δ/ina22Δ</i><br>(OLY10)                           | <i>MATa; his3Δ1; leu2Δ0; met15Δ0; ura3Δ0;</i><br><i>INA17::kanMX4; INA22::HIS3MX6</i>                                  | This study |
