# Supplementary material
Source: PubMed Central journal article supplement (PMC4194097)
Supplement: embj0033-1624-sd7.pdf [file embj0033-1624-sd7.pdf]

**Table S2** Quantitative analysis of Ina22 complexes

Ina22 complexes were affinity-purified from mitochondria differentially labeled with SILAC amino acids and analyzed by LC-MS as described in Materials and Methods. Mean  $\log_{10}$  SILAC ratios of three independent replicates as well as the p-value were calculated for each protein. PEP, posterior error probability; n. def., not defined.
