# Supplementary material
Source: PubMed Central journal article supplement (PMC4194097)
Supplement: embj0033-1624-sd8.pdf [file embj0033-1624-sd8.pdf]

Manuscript EMBO-2014-88076

## **The INAC complex facilitates assembly of the peripheral stalk of the mitochondrial F1Fo-ATP synthase**

Oleksandr Lytovchenko, Nataliia Naumenko, Silke Oeljeklaus, Bernhard Schmidt, Karina von der Malsburg, Markus Deckers, Bettina Warscheid, Martin van der Laan and Peter Rehling

*Corresponding author: Peter Rehling, Goettingen, University*

---

|                         |                     |                  |
|-------------------------|---------------------|------------------|
| <b>Review timeline:</b> | Submission date:    | 30 January 2014  |
|                         | Editorial Decision: | 25 February 2014 |
|                         | Revision received:  | 13 April 2014    |
|                         | Editorial Decision: | 09 May 2014      |
|                         | Revision received:  | 09 May 2014      |
|                         | Accepted:           | 13 May 2014      |

---

*Editor: Andrea Leibfried*

No Peer Review Process File is available with this article, as the authors have chosen not to make the review process public in this case.
