# Supplementary material
Source: PubMed Central journal article supplement (PMC4194097)

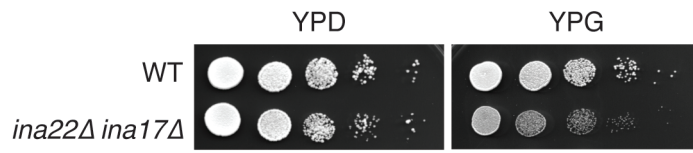

**Figure S3** Growth test of wild type and *ina22Δ/ina17Δ* strains. The test was performed as in Figure 1C.

Supplement: embj0033-1624-sd3.pdf [file embj0033-1624-sd3.pdf]
